# Supplementary material
Source: PubMed Central journal article supplement (PMC9220950)
Supplement: jciinsight-7-158079-s255.pdf [file jciinsight-7-158079-s255.pdf]

SUPPLEMENTAL MATERIAL

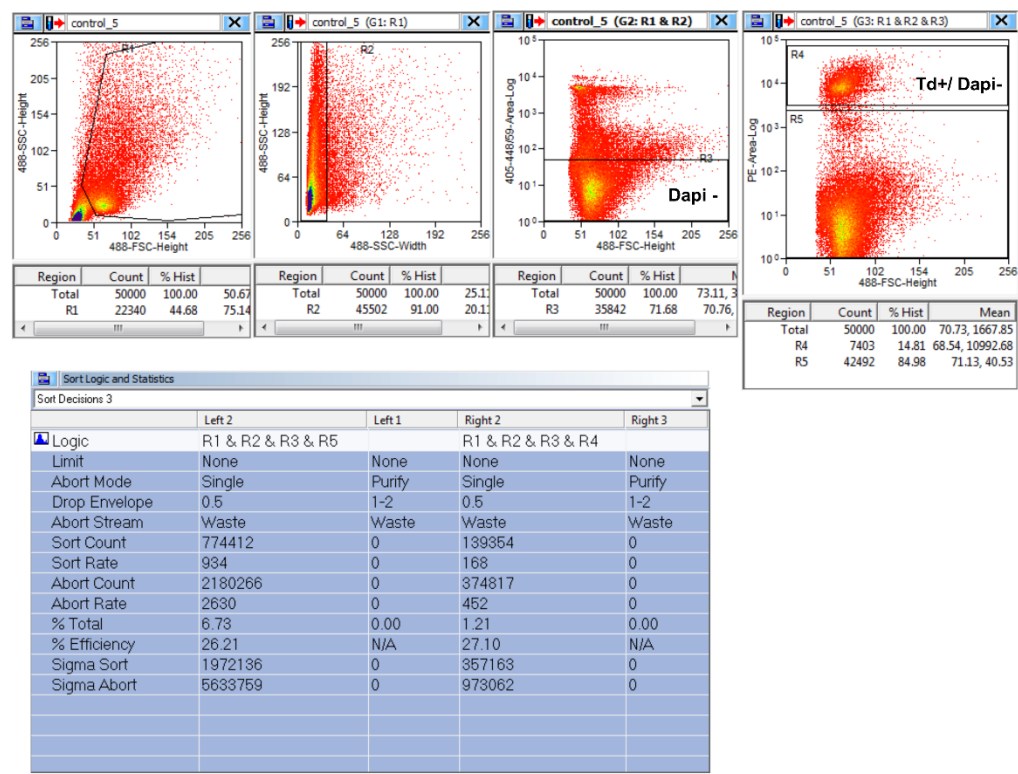

**Supplemental Figure 1.** The gating condition for sorting tdTOMATO (Td)+ /DAPI- cells in Fluorescence-activated cell sorting (FACS).

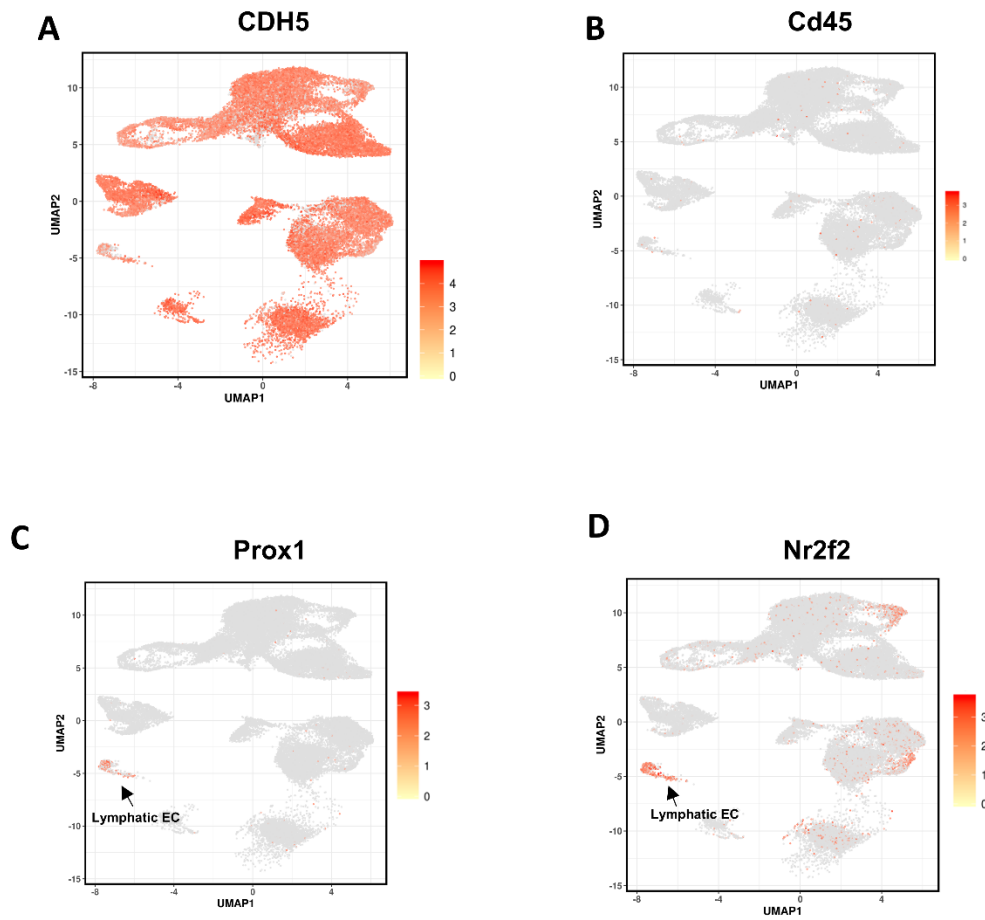

**Supplemental Figure 2.** The UMAP of gene expression levels in lung endothelial cells of all time points. (A) *Cdh5*, (B) *Cd45*, (C) *Prox1* and (D) *Nr2f2*. Each dot represents an individual cell. The color bars show gene expression level in  $\log_2$  scale. Light red to red color represents low to high expression level.

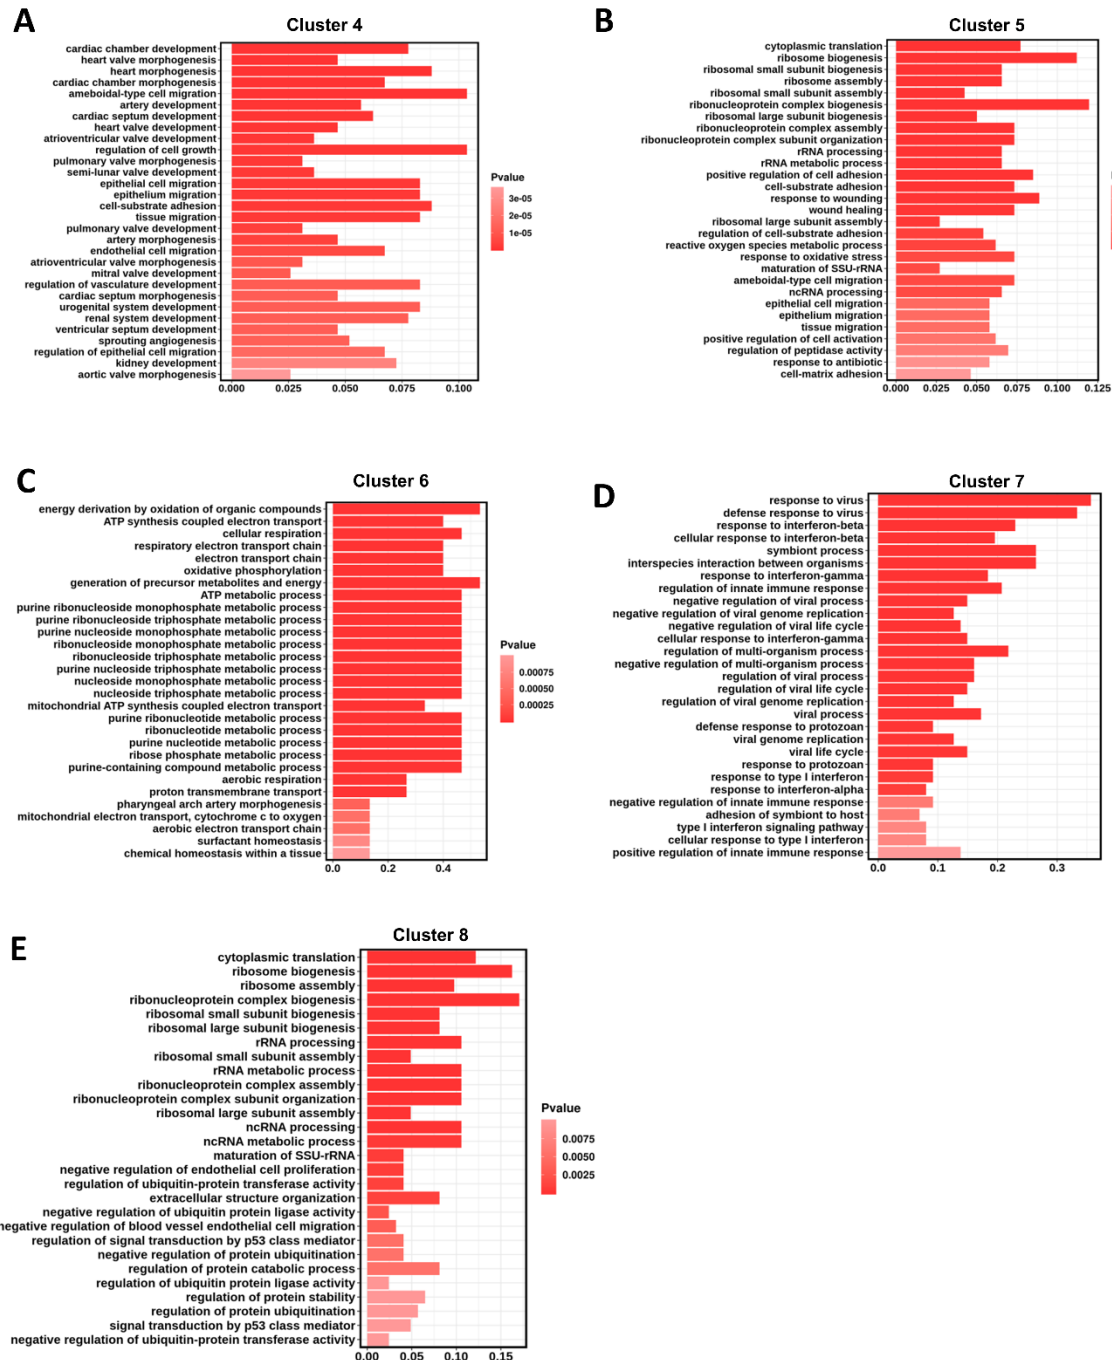

**Supplemental Figure 3.** The biological process GO terms for cluster4 (A), 5 (B), 6 (C), 7 (D), and 8 (E) at baseline with P values indicated as the color of the bars. Light red to red represents low to high significance.

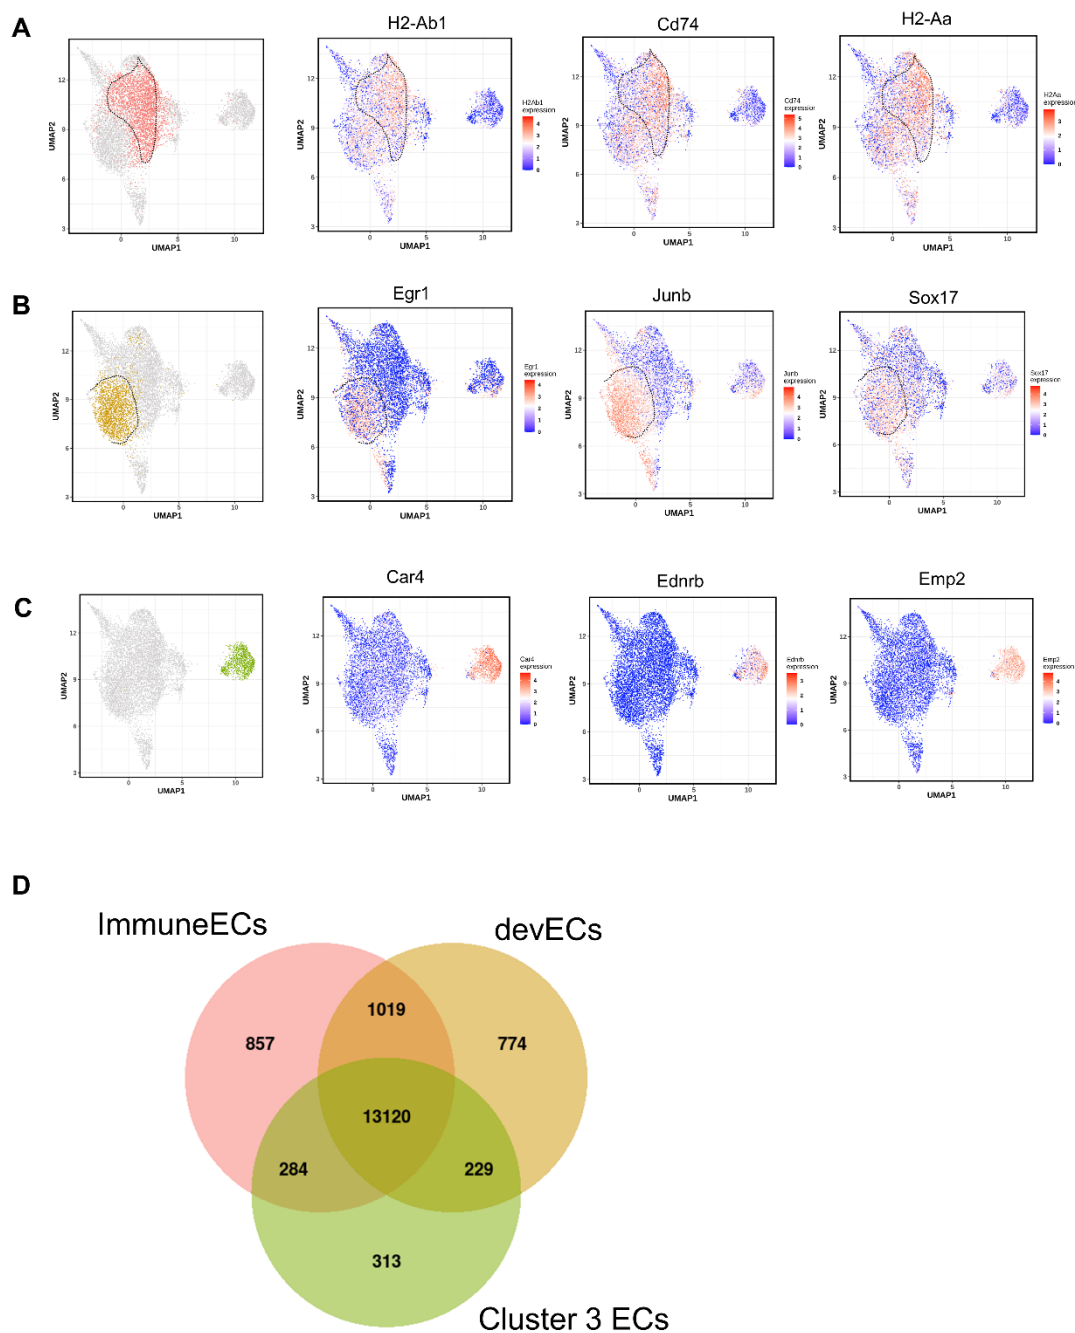

**Supplemental Figure 4.** (A-C) UMAPs to visualize immuneEC (A), devEC (B), and cluster 3 ECs (C), and the expression levels of their representative marker genes. The color bars in UMAPs indicate gene expression levels in log<sub>2</sub> scale. (D) Venn diagram of shared and differentially expressed genes among three major subpopulations at baseline – immuneECs, devECs and cluster 3 ECs (Car4 high EC population).

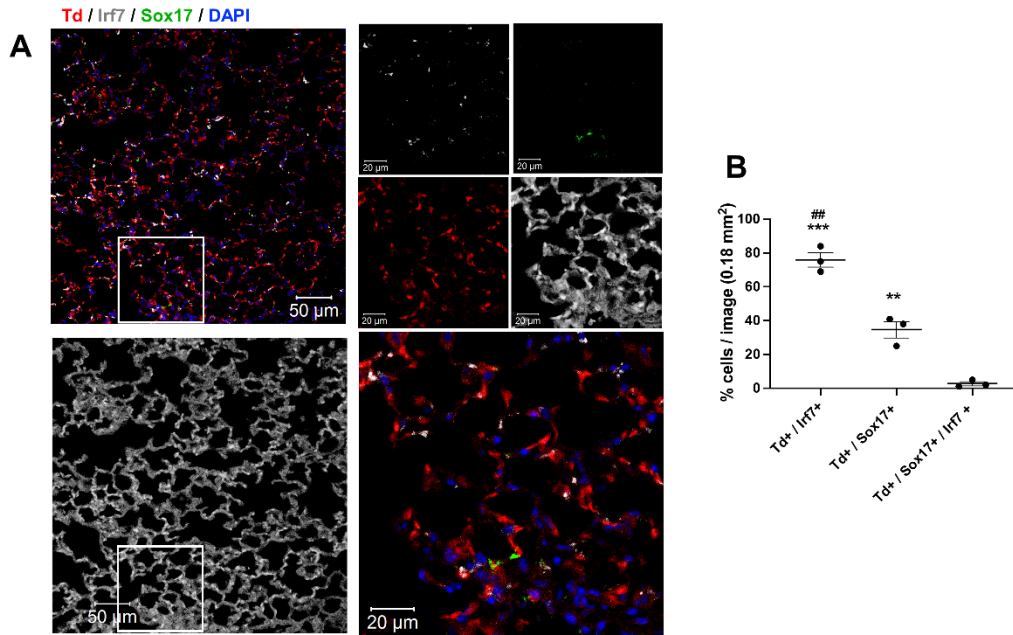

**Supplemental Figure 5.** Confocal images (A) and quantification (B) of immunofluorescence of mouse lung paraffin embedded tissues following LPS treatment for 6 hours. The lung structures are shown in A by enhancing autofluorescence of lung tissues. Lung ECs expressed tdTomato (Td) in tamoxifen-treated tdTomato<sup>fl/fl</sup>:Cdh5-CreERT(+) mice. Irf7 and Sox17 proteins are identified by immunofluorescence as grey and green respectively. Nuclei were stained by DAPI. The small region is zoomed in as shown on the right. Scale bars are 50μm on the left and 20μm on the right. The statistical analysis of numbers of Td+/Irf7+, Td+/Sox17+, and Td+/Sox17+/Irf7+ cells in lung sections of mice were shown in B. Data are shown as means ± SE from three independent mice. \*\*\*: P<0.001 and \*\*:P<0.01 compared to Td+/Sox17+/Irf7+ cells, ##: P<0.01 compared to Td+/Sox17+ by one-way ANOVA.

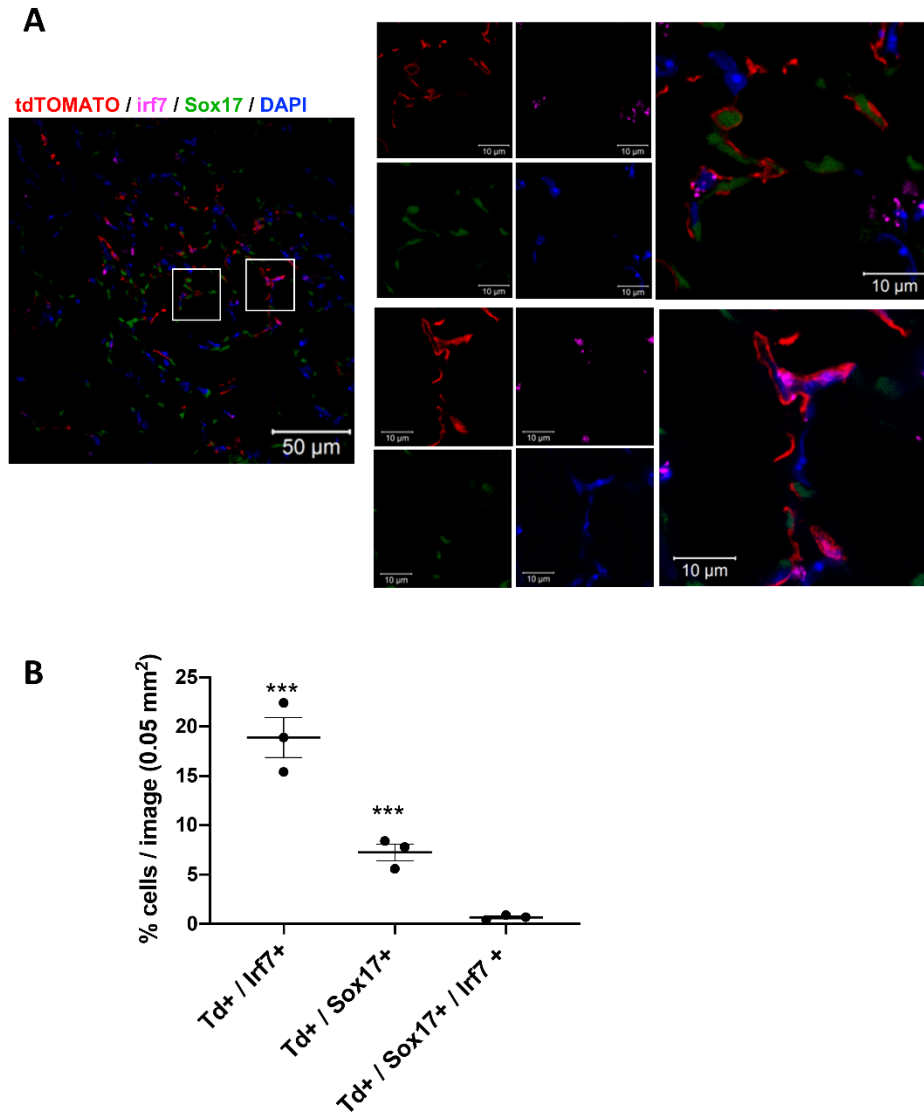

**Supplemental Figure 6.** (A) Confocal images of RNA FISH of mouse lung sections following LPS treatment for 24 hours. The lung ECs expressed tdTOMATO (Td). The RNAs of *Irf7* and *Sox17* were probed and labeled with magenta and green respectively. Nuclei were stained by DAPI. The small regions in square are shown at higher magnification on the right. Scale bar is 50μm on the left and 10μm on the right. (B) The statistical analysis of numbers of Td+/Irf7+, Td+/Sox17+, and Td+/Sox17+/Irf7+ cells in lung sections of mice following LPS treatment for 24 hours. Data are shown as means  $\pm$  SE from three independent mice with each dot presenting one mouse. \*\*\*:  $P < 0.001$  compared to Td+/Sox17+/Irf7+ cells, by one-way ANOVA.

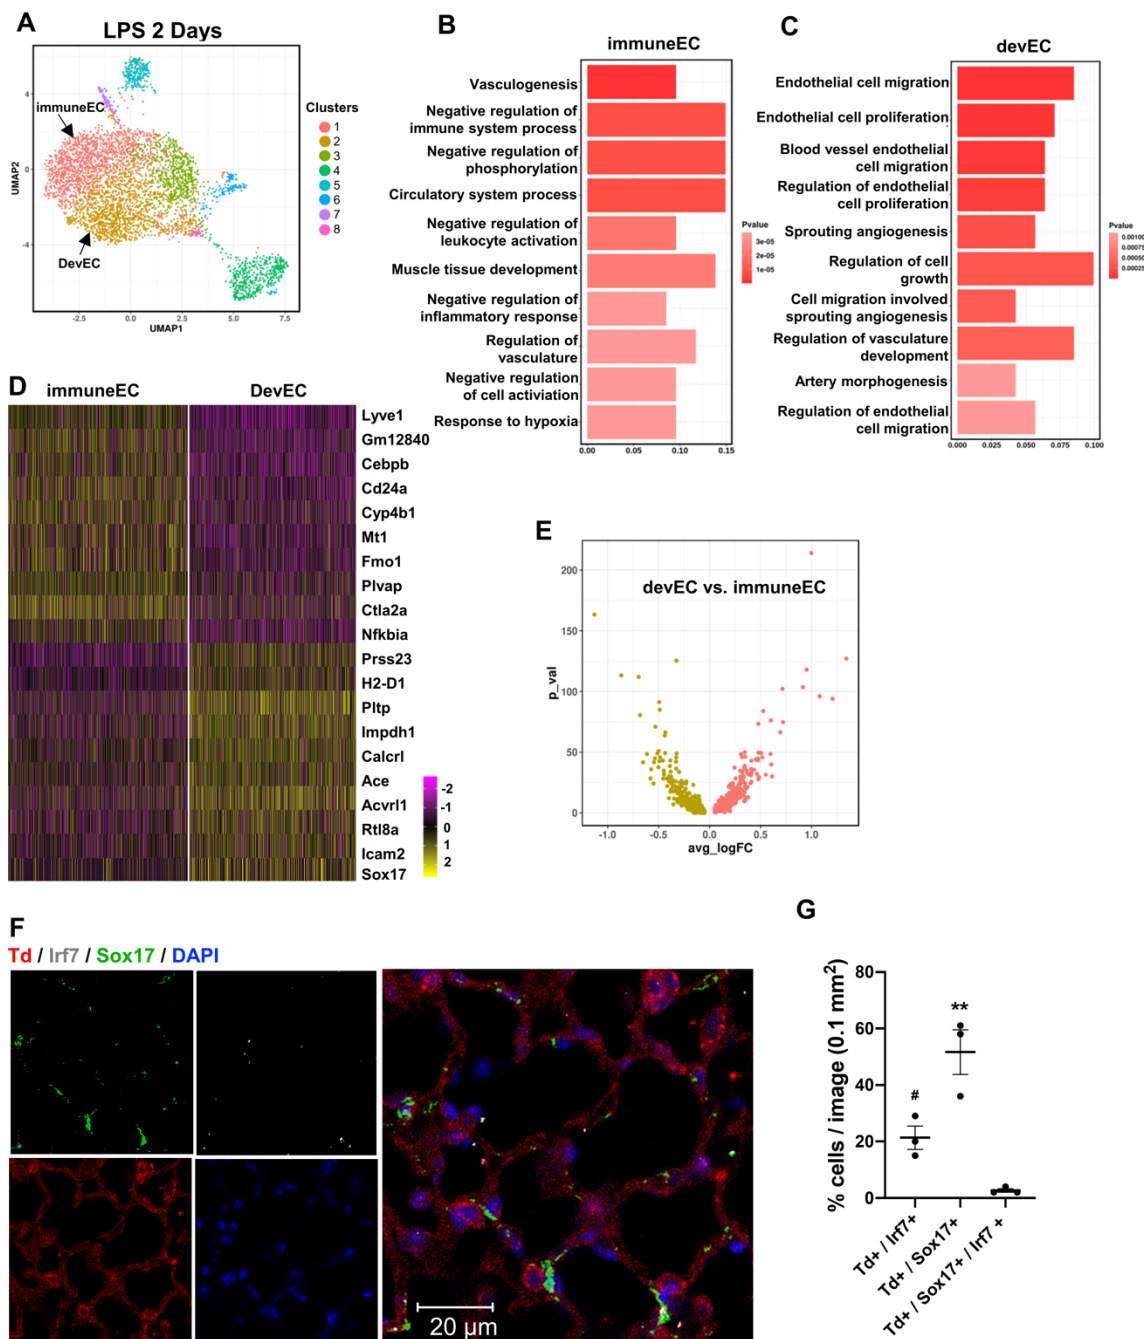

**Supplemental Figure 7. Analysis of inflammatory and developmental lung EC subpopulations of lung ECs during the resolution phase (LPS treatment 2 days).** (A) The UMAP of 4,608 individual lung ECs isolated at 2 days following systemic LPS injury. Different colors indicate different clusters with immuneEC and devEC labeled. (B-C) The GO terms of immuneEC (B) and devEC (C) indicate the enriched biological processes in each cluster. P values are indicated on the left in a color scale. (D) The heatmap of most differentially expressed genes of immuneEC and devEC subpopulations with the color bar showing gene expression levels on a log<sub>2</sub> scale. (E) The volcano plot of immuneEC and devEC with differentially expressed genes between devEC and immuneEC. The genes were selected by log<sub>2</sub> fold change p < 0.05. The x-axis is the average expression log fold change. y axis is the log p-value. (F-G) Confocal images

(F) and quantification (G) of protein immunostaining in mouse lung sections following LPS treatment for 2 days. Irf7 and Sox17 proteins are identified by immunofluorescence as grey and green respectively. Scale bars are 20µm. The quantification of Td+/Irf7+, Td+/Sox17+, and Td+/Sox17+/Irf7+ cells in lung sections of mice is shown in I. Data are shown as mean ± SE from three independent mice. \*\*: P<0.01 compared to Td+/Sox17+/Irf7+ cells, #: P<0.05 compared to Td+/Sox17+ by one-way ANOVA.

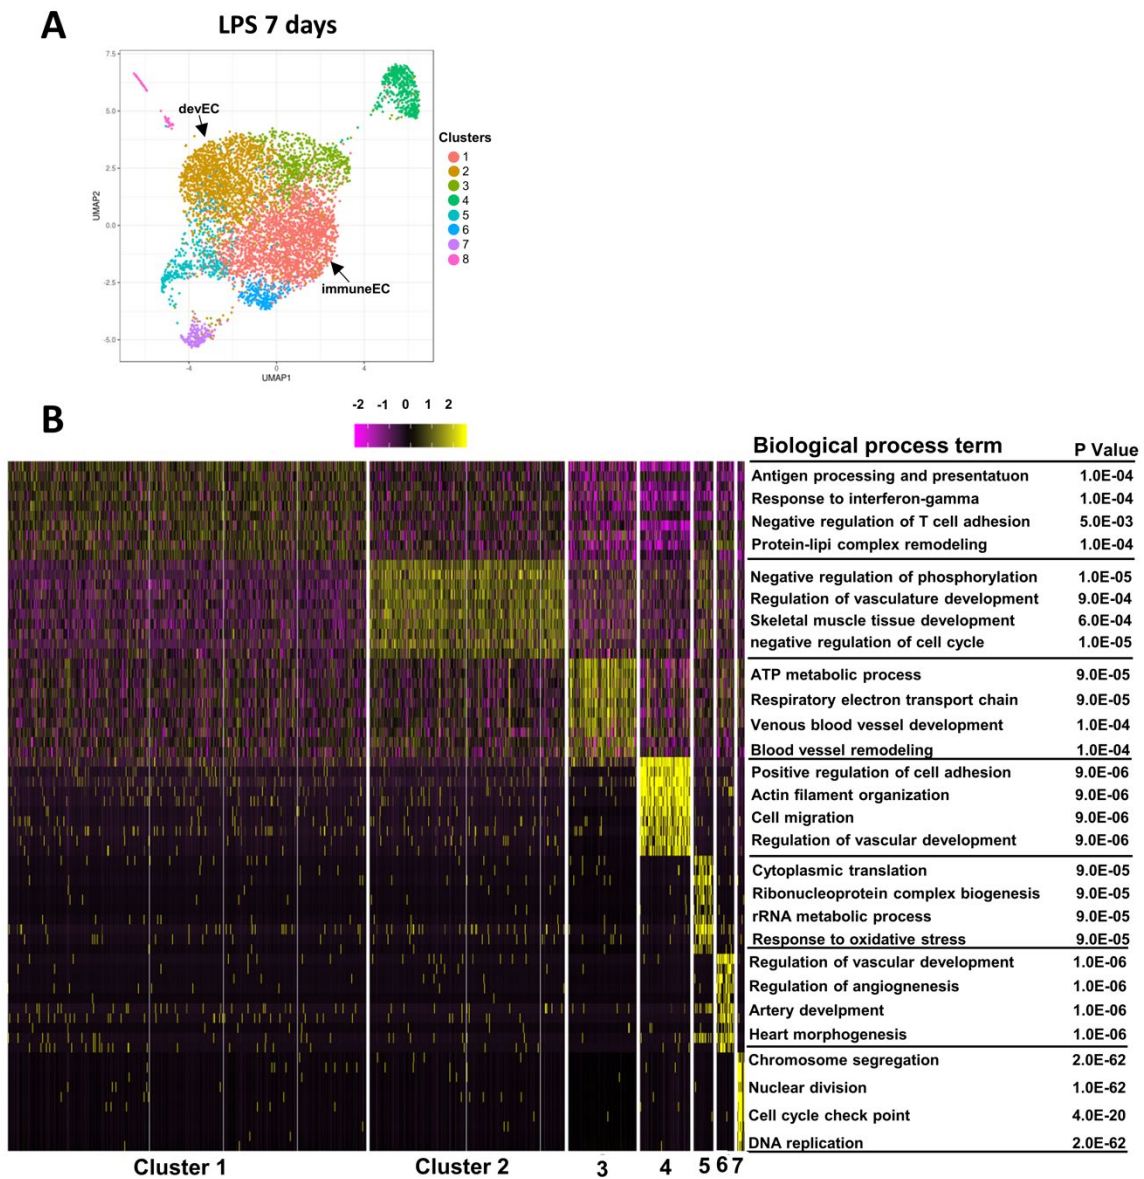

**Supplemental Figure 8. (A)** The UMAP of 6,171 individual lung endothelial cells following LPS treatment 7 days clustered by unbiased Seurat (v2.3) R package with different colors presenting different clusters. The immuneEC (cluster 1) and devEC (cluster 2) were indicated. **(B)** The heatmap of most differentiated genes of lung endothelial cells following LPS treatment 7 days among cluster 1 to 7 with representative biological process GO terms (Biological Process terms) and P value indicated in left. The color bars indicate gene expression level in  $\log_2$  scale. Purple to yellow color represents low to high expression level.

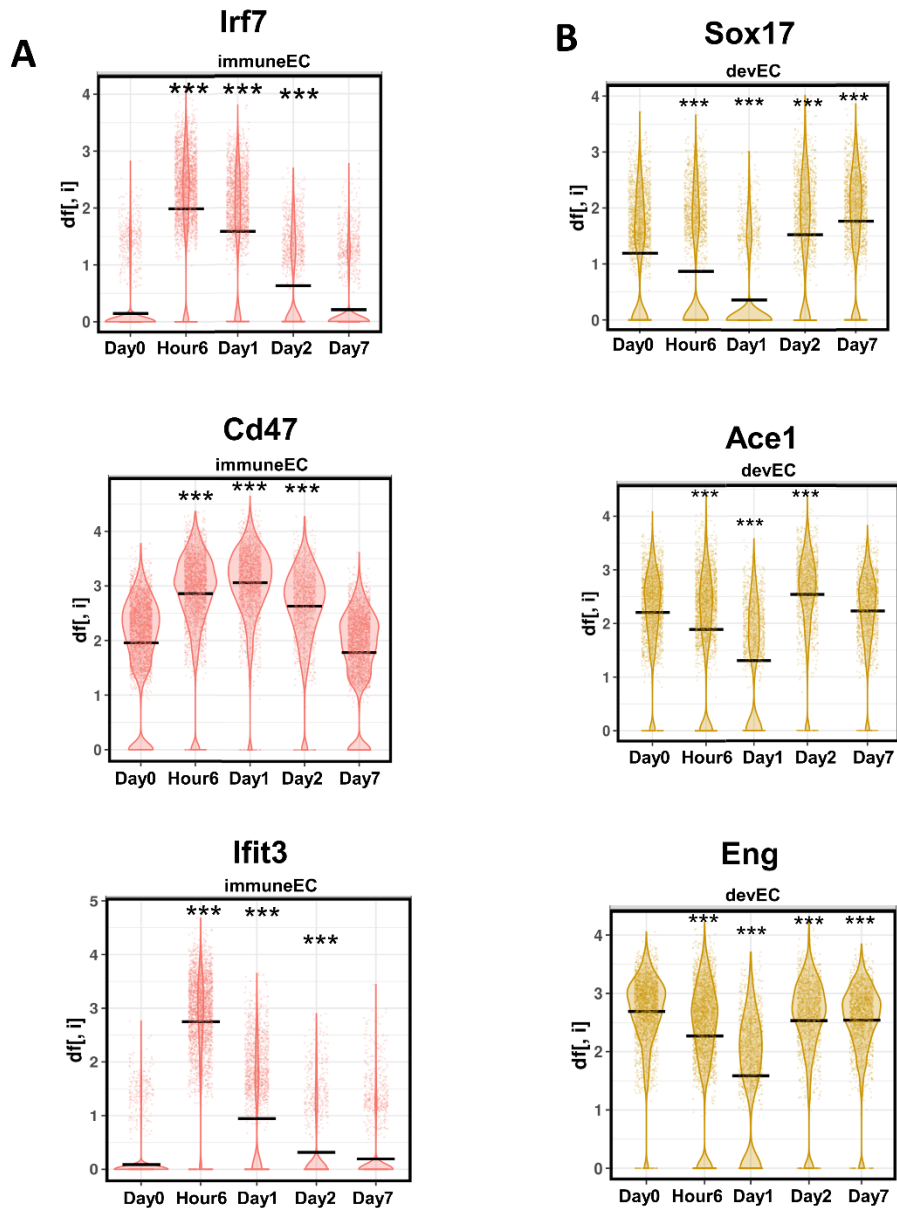

**Supplemental Figure 9.** The violin plots of representative genes in immuneEC (**A**) and devEC (**B**). X-axis is LPS injury at different time points. Y-axis is the relative expression level of genes of interest. \*\*\*:  $P < 0.001$  compared to control by one-way ANOVA.

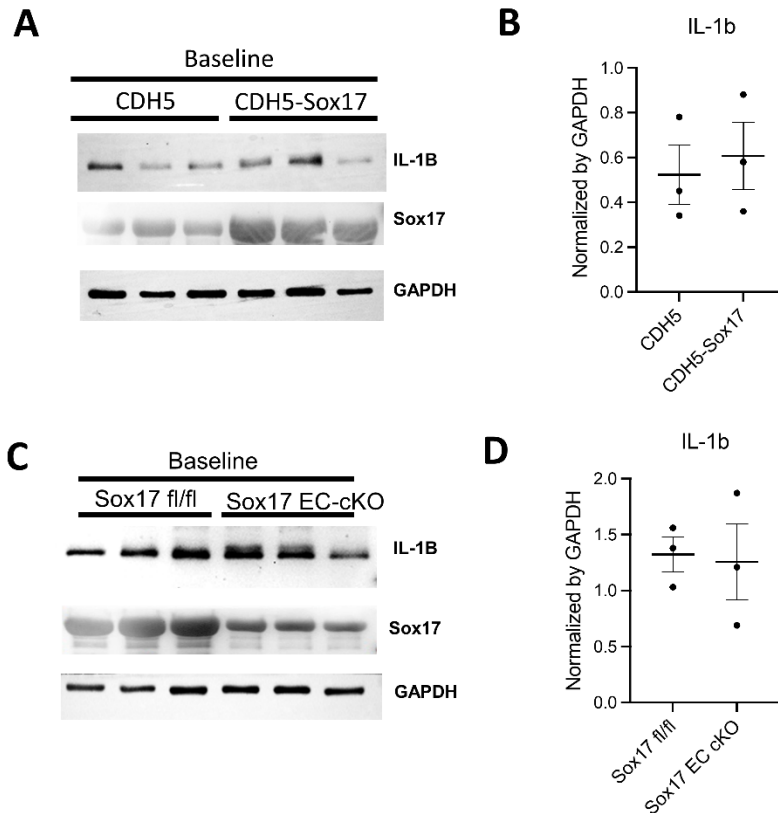

**Supplemental Figure 10.** (A) Western blots of fresh isolated lung ECs from C57BL/6J mice with liposome delivery of CDH5 vector or CDH5-Sox17 for 3 days. N=3 for each group. (B) The quantification of IL-1 $\beta$  protein level normalized by GAPDH. No significance between two groups was found by unpaired t-test. (C) Western blots of fresh isolated lung ECs from Sox17 fl/fl mice or Sox17 EC cKO mice. N=3 for each group. (D) The quantification of IL-1 $\beta$  protein level normalized by GAPDH. No significance between two groups was found by unpaired t-test.



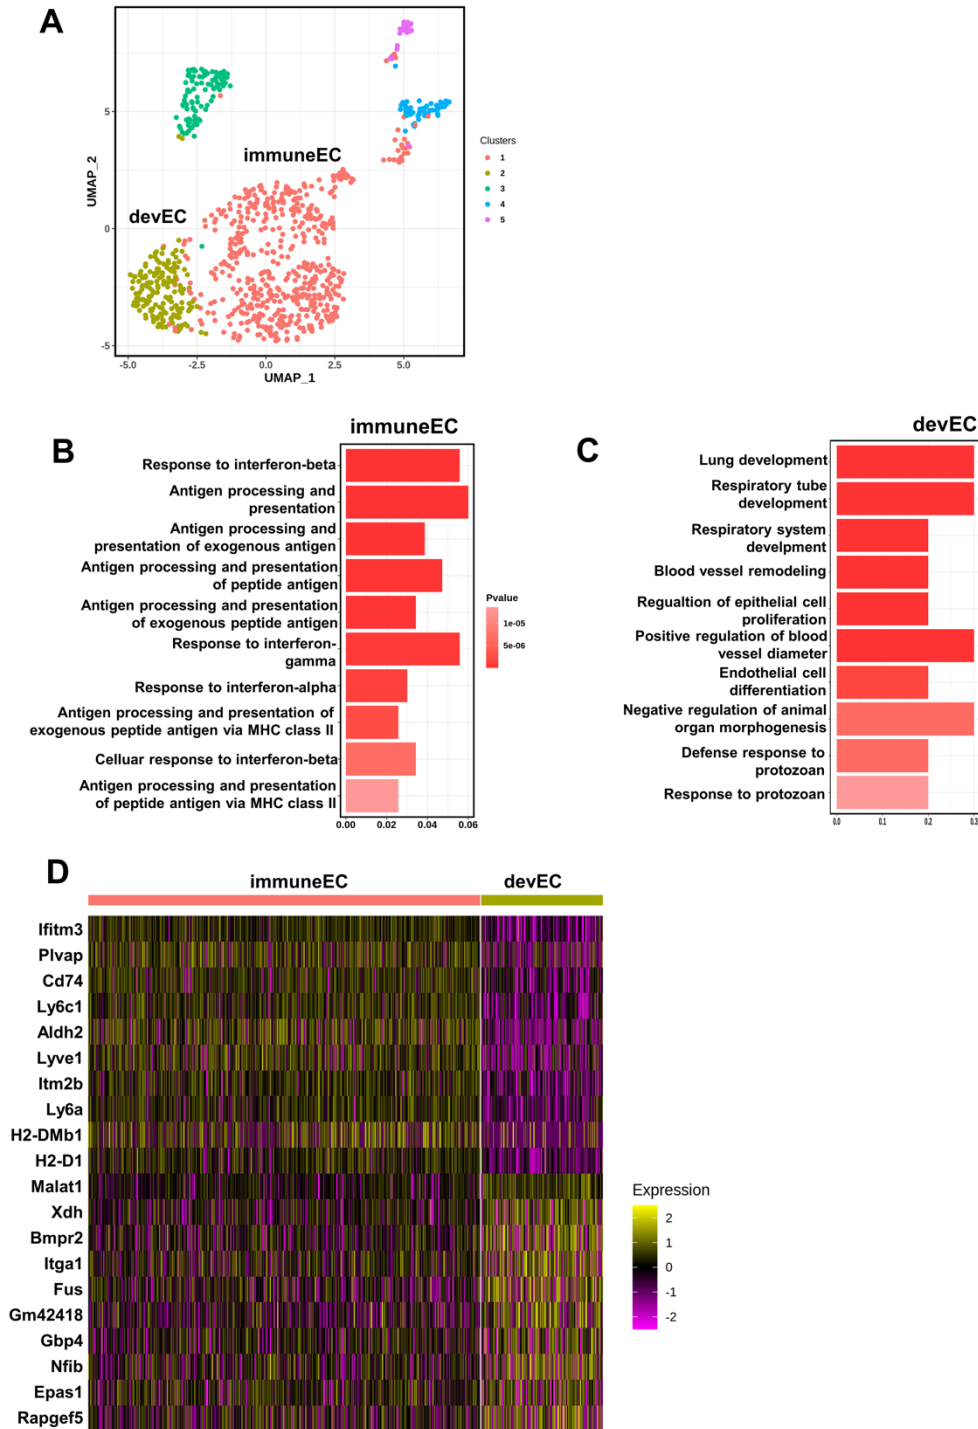

**Supplemental Figure 12. Analysis of inflammatory and developmental lung EC subpopulations of lung ECs at day 7 post H1N1-inoculation.** (A) The UMAP of 923 individual lung ECs isolated at day 7 post H1N1-inoculation. Different colors indicate different clusters with immuneEC and devEC labeled. (B-C) The GO terms of immuneEC (B) and devEC (C) indicate the enriched biological processes in each cluster. P values are indicated on the left in a color scale. (D) The heatmap of most differentially expressed genes of immuneEC and devEC subpopulations with the color bar showing gene expression levels on a  $\log_2$  scale.

## Supplemental Table 1

General information of scRNA-seq of lung endothelial cells at different time points

|                                      | baseline   | LPS<br>6 hours | LPS<br>24 hours | LPS<br>2 days | LPS<br>3 days | LPS<br>7 days |
|--------------------------------------|------------|----------------|-----------------|---------------|---------------|---------------|
| Cell number                          | 8,191      | 6,527          | 5,158           | 4,608         | 5,318         | 6,171         |
| Median gene<br>number per<br>cell    | 1,568      | 1,147          | 1,252           | 1,770         | 1,897.5       | 1,872         |
| Total gene<br>number                 | 17,035     | 16,409         | 16,069          | 16,501        | 16,664        | 16,966        |
| UMI* number<br>per cell              | 3,003      | 2,273          | 2,544.5         | 3,788         | 4,289         | 3,694         |
| Total UMI*<br>number                 | 29,013,732 | 16,689,633     | 15,099,705      | 19,572,952    | 27,346,395    | 25,398,294    |
| Cell number of<br>inflamEC           | 3460       | 2759           | 2278            | 1531          | -             | 3083          |
| Median gene<br>number of<br>inflamEC | 1,502      | 1,090          | 1,229.5         | 1,758         | -             | 1,884         |
| Total gene<br>number of<br>inflamEC  | 15,280     | 14,730         | 14,649          | 14,638        | -             | 15,499        |
| Cell number of<br>devEC              | 2206       | 2601           | 1561            | 1424          | -             | 1683          |
| Median gene<br>number of<br>devEC    | 1,567.5    | 1,154          | 1,242           | 1,723.5       | -             | 1,903         |
| Total gene<br>number of<br>devEC     | 15,142     | 14,861         | 14,059          | 14,650        | -             | 15,234        |
| Cell number of<br>devEC              | -          | -              | -               | -             | 635           | -             |
| Median gene<br>number of<br>proEC    | -          | -              | -               | -             | 2,951         | -             |
| Total gene<br>number of<br>proEC     | -          | -              | -               | -             | 14,265        | -             |
